# Supplementary material
Source: PubMed Central journal article supplement (PMC7182525)
Supplement: mmc1.pdf [file mmc1.pdf]

# THE LANCET

## Gastroenterology & Hepatology

### Supplementary appendix

This appendix formed part of the original submission and has been peer reviewed.  
We post it as supplied by the authors.

Supplement to: Mak JWY, Chan FKL, Ng SC, et al. Probiotics and COVID-19: one size does not fit all. *Lancet Gastroenterol Hepatol* 2020; published online April 24.  
[https://doi.org/10.1016/S2468-1253\(20\)30122-9](https://doi.org/10.1016/S2468-1253(20)30122-9).

| Publication                 | Disease                               | Study Design                      | No. of individuals | Intervention                                                                                                                                                                                                                       | Primary outcome                                                                                 | Main findings                                                                                                                                        | Ref. |
|-----------------------------|---------------------------------------|-----------------------------------|--------------------|------------------------------------------------------------------------------------------------------------------------------------------------------------------------------------------------------------------------------------|-------------------------------------------------------------------------------------------------|------------------------------------------------------------------------------------------------------------------------------------------------------|------|
| Hempel, S. <i>et al.</i>    | Antibiotic-associated diarrhoea (AAD) | Systematic Review & Meta-analysis | 11,811             | Probiotics ( <i>Lactobacillus</i> , <i>Bifidobacterium</i> , <i>Saccharomyces</i> , <i>Streptococcus</i> , <i>Enterococcus</i> , and/or <i>Bacillus</i> )                                                                          | Prevention and treatment of (AAD)                                                               | Probiotics significantly reduced AAD (RR 0.58; 95% CI, 0.50 to 0.68; P < .001)                                                                       | 1    |
| Blaabjerg, S. <i>et al.</i> | Antibiotic-associated diarrhoea (AAD) | Systematic Review & Meta-analysis | 3,631              | Probiotics ( <i>Lactobacilli</i> spp., <i>Lactococcus</i> spp., <i>Bacillus</i> spp., <i>Bifidobacterium</i> spp., <i>Saccharomyces</i> spp., <i>Leuconostoc cremoris</i> , <i>Clostridium</i> spp., or <i>Streptococcus</i> spp.) | Incidence of (AAD)                                                                              | Probiotics significantly reduced AAD (RR 0.49; 95% CI, 0.36 to 0.66)                                                                                 | 2    |
| Allen, S. J. <i>et al.</i>  | Antibiotic-associated diarrhoea (AAD) | RCT                               | 2,981              | Inpatients ≥65 years and exposed to ≥ 1 antibiotics randomised to either multi-strain preparation of <i>Lactobacilli</i> & <i>bifidobacterial</i> or placebo for 21 days                                                           | Occurrence of AAD within 8 weeks and C difficile diarrhoea (CDD) within 12 weeks of recruitment | No significant difference in occurrence of AAD (including CDD) in probiotics (10.8%) and placebo group (10.4%). (RR 1.04; 95% CI 0.84-1.28; p=0.71). | 3    |
| King S, <i>et al.</i>       | Acute respiratory infections          | Systematic Review & Meta-analysis | 8,761              | Probiotics, specifically <i>Lactobacillus</i> and <i>Bifidobacterium</i> strains                                                                                                                                                   | Duration of acute respiratory infections in healthy children and adults                         | Significantly fewer numbers of days of illness per person, shorter illness episodes by almost a day                                                  | 4    |

|                            |                                            |                                   |       |                                                                                                                                                                                                                                                                                                                                                                                                                                                                                          |                                                                     |                                                                                                                                                                                                                                   |   |
|----------------------------|--------------------------------------------|-----------------------------------|-------|------------------------------------------------------------------------------------------------------------------------------------------------------------------------------------------------------------------------------------------------------------------------------------------------------------------------------------------------------------------------------------------------------------------------------------------------------------------------------------------|---------------------------------------------------------------------|-----------------------------------------------------------------------------------------------------------------------------------------------------------------------------------------------------------------------------------|---|
|                            |                                            |                                   |       |                                                                                                                                                                                                                                                                                                                                                                                                                                                                                          |                                                                     | and fewer numbers of days absent from day care/school/work in participants who received probiotics than placebo                                                                                                                   |   |
| Hao Q, et al.              | Acute upper respiratory infections         | Systematic Review & Meta-analysis | 3,451 | Probiotics ( <i>Lactobacillus plantarum</i> , <i>Lactobacillus paracasei</i> 8700:2, <i>Lactobacillus rhamnosus</i> (GG or HN001), <i>Lactobacillus casei</i> Shirota, <i>Lactobacillus bulgaricus</i> OLL 073R-1, <i>Lactobacillus acidophilus</i> , <i>Lactobacillus gasseri</i> , <i>Streptococcus thermophilus</i> OLS 3059, <i>Bifidobacterium lactis</i> BB-12, <i>Bifidobacterium bifidum</i> MF 20/5, <i>Bifidobacterium animalis</i> and <i>Bifidobacterium longum</i> SP 07/3) | Prevention of acute URTIs                                           | Probiotics were better than placebo in number of participants experiencing episodes of acute URTI (Rate ratio 0.53; 95% CI 0.37 to 0.76) and reduced antibiotic prescription rates for acute URTIs (OR 0.65; 95% CI 0.45 to 0.94) | 5 |
| Lenoir-Wijnkoop, I. et al. | Flu-like respiratory tract infections(RTI) | Economic modelling study          | -     | Probiotics                                                                                                                                                                                                                                                                                                                                                                                                                                                                               | RTI-related health and cost outcomes in the US primary care setting | Probiotics allowed cost savings for health care payer by USD4.6 million , decreased antibiotic prescription by 1.39–2.16 million courses, reduced absence from                                                                    | 6 |

|                       |                                       |                                   |      |                                                                                                                                                                                                                                                                          |                                                                              |                                                                                                                                                                          |   |
|-----------------------|---------------------------------------|-----------------------------------|------|--------------------------------------------------------------------------------------------------------------------------------------------------------------------------------------------------------------------------------------------------------------------------|------------------------------------------------------------------------------|--------------------------------------------------------------------------------------------------------------------------------------------------------------------------|---|
|                       |                                       |                                   |      |                                                                                                                                                                                                                                                                          |                                                                              | work by 3.58–4.2 million days                                                                                                                                            |   |
| Morrow, L. E., et al. | Ventilator-associated pneumonia (VAP) | RCT                               | 148  | Patients were randomised to enteral probiotics or inert inulin-based placebo twice/day in addition to routine care                                                                                                                                                       | Incidence of microbiologically confirmed VAP incidence                       | Patients treated with <i>Lactobacillus</i> were significantly less likely to develop VAP compared with patients treated with placebo (40.0% vs. 19.1%; <i>P</i> = 0.007) | 7 |
| Zeng, J. et al.       | Ventilator-associated pneumonia (VAP) | RCT                               | 235  | Patients were randomized to probiotics capsule (live <i>Bacillus subtilis</i> & <i>Enterococcus faecalis</i> (Medilac-S) 0.5 g x3 times daily via nasogastric tube plus standard preventive strategies or standard preventive strategies alone, for a maximum of 14 days | Incidence of microbiologically confirmed VAP in patients intubated for ≥48 h | Patients treated with probiotics had significantly less VAP compared to placebo group (36.4% vs. 50.4%, <i>p</i> =0.031)                                                 | 8 |
| Bo, L. et al.         | Ventilator-associated pneumonia (VAP) | Systematic Review & Meta-analysis | 1083 | Probiotics ( <i>Lactobacillus casei rhamnosus</i> ; <i>Lactobacillus plantarum</i> ; Synbiotic 2000FORTE; Eryphilus; combination <i>Bifidobacterium longum</i> + <i>Lactobacillus bulgaricus</i> + <i>Streptococcus thermophilus</i> )                                   | Effectiveness and safety of probiotics for preventing VAP                    | Probiotics decreased incidence of VAP (OR 0.70, 95% CI 0.52 to 0.95, low quality evidence)                                                                               | 9 |

OR = Odds ratio; RR = Relative risk; CI = confidence interval

## Reference

1. Hempel, S. et al. Probiotics for the prevention and treatment of antibiotic-associated diarrhea: a systematic review and meta-analysis. *JAMA* **307**, 1959-1969, doi:10.1001/jama.2012.3507 (2012).
2. Blaabjerg, S., Artzi, D. M. & Aabenhus, R. Probiotics for the Prevention of Antibiotic-Associated Diarrhea in Outpatients-A Systematic Review and Meta-Analysis. *Antibiotics (Basel)* **6**, doi:10.3390/antibiotics6040021 (2017).

3. Allen, S. J. *et al.* Lactobacilli and bifidobacteria in the prevention of antibiotic-associated diarrhoea and Clostridium difficile diarrhoea in older inpatients (PLACIDE): a randomised, double-blind, placebo-controlled, multicentre trial. *Lancet* **382**, 1249-1257, doi:10.1016/S0140-6736(13)61218-0 (2013).
4. King, S., Glanville, J., Sanders, M. E., Fitzgerald, A. & Varley, D. Effectiveness of probiotics on the duration of illness in healthy children and adults who develop common acute respiratory infectious conditions: a systematic review and meta-analysis. *Br J Nutr* **112**, 41-54, doi:10.1017/S0007114514000075 (2014).
5. Hao, Q., Dong, B. R. & Wu, T. Probiotics for preventing acute upper respiratory tract infections. *Cochrane Database Syst Rev*, CD006895, doi:10.1002/14651858.CD006895.pub3 (2015).
6. Lenoir-Wijnkoop, I. *et al.* Probiotics Reduce Health Care Cost and Societal Impact of Flu-Like Respiratory Tract Infections in the USA: An Economic Modeling Study. *Front Pharmacol* **10**, 980, doi:10.3389/fphar.2019.00980 (2019).
7. Morrow, L. E., Kollef, M. H. & Casale, T. B. Probiotic prophylaxis of ventilator-associated pneumonia: a blinded, randomized, controlled trial. *Am J Respir Crit Care Med* **182**, 1058-1064, doi:10.1164/rccm.200912-1853OC (2010).
8. Zeng, J. *et al.* Effect of probiotics on the incidence of ventilator-associated pneumonia in critically ill patients: a randomized controlled multicenter trial. *Intensive Care Med* **42**, 1018-1028, doi:10.1007/s00134-016-4303-x (2016).
9. Bo, L. *et al.* Probiotics for preventing ventilator-associated pneumonia. *Cochrane Database Syst Rev*, CD009066, doi:10.1002/14651858.CD009066.pub2 (2014).
